# Supplementary material for: Thin film of coumarin-3-carboxylate and surfactant co-intercalated layered double hydroxide with polarized photoluminescence: a joint experimental and molecular dynamics study
Source: Royal Society of Chemistry journal article supplement (doi:10.1039/b924821h), 2010-01-01
Supplement: b924821h.pdf [file b924821h.pdf]

## Supplementary Information for

# Thin Film of Coumarin-3-carboxylate and Surfactant Co-intercalated Layered Double Hydroxide with Polarized Photoluminescence: A Joint Experimental and Molecular Dynamic Study

Dongpeng Yan, Jun Lu, \* Jing Ma, Min Wei, \* Shenghui Qin, Li Chen, David G. Evans, and Xue Duan

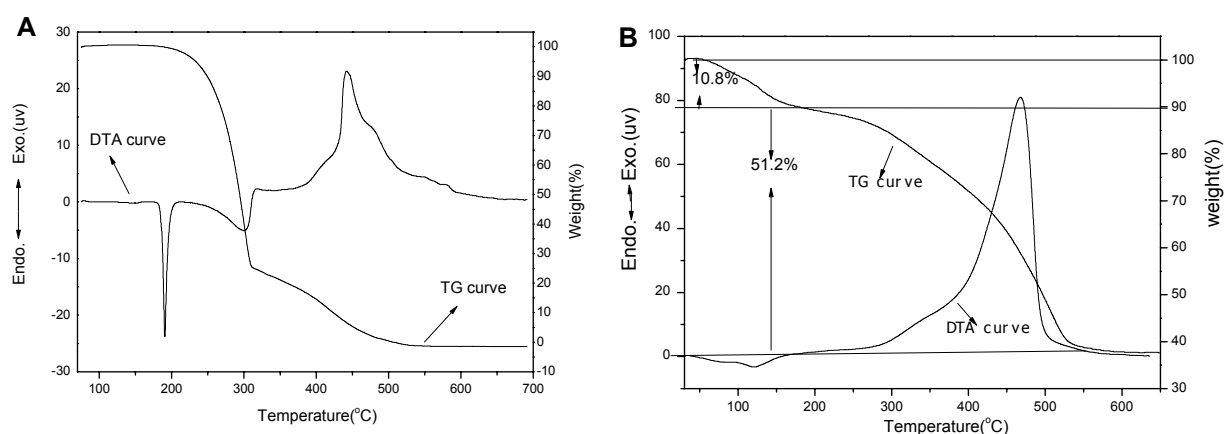

Figure S1. TG and DTA curves for A. C3C, B. C3C/Mg-Al-LDH.

Table S1: Chemical compositions for the two samples of C3C-DDS/LDH

| Sample Initial x (%) | Chemical Composition                                                                                                                                                    | Mg/Al Ratio | Sample Final x (%) |
|----------------------|-------------------------------------------------------------------------------------------------------------------------------------------------------------------------|-------------|--------------------|
| 25.0                 | $\text{Mg}_{0.697}\text{Al}_{0.303}(\text{OH})_2(\text{C}_{10}\text{H}_5\text{O}_4)_{0.058}(\text{C}_{12}\text{H}_{25}\text{SO}_3)_{0.245}\cdot 0.97\text{H}_2\text{O}$ | 2.30        | 19.3               |
| 100.0                | $\text{Mg}_{0.688}\text{Al}_{0.312}(\text{OH})_2(\text{C}_{10}\text{H}_5\text{O}_4)_{0.312}\cdot 0.82\text{H}_2\text{O}$                                                | 2.21        | 100.0              |

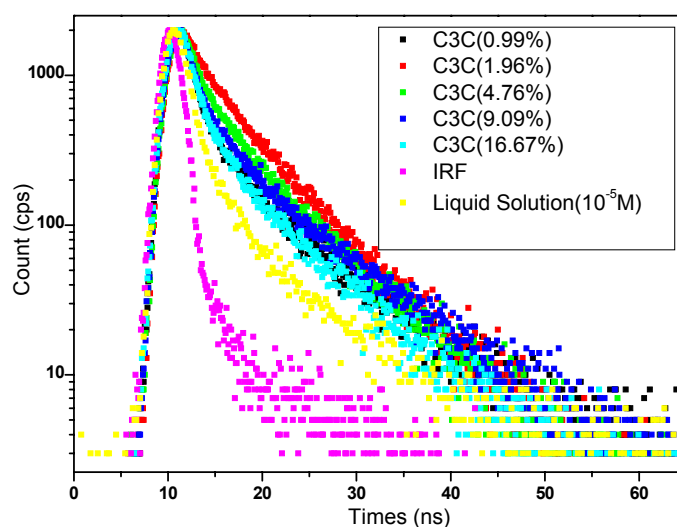

**Figure S2.** The fluorescence decay profiles of C3C-DDS/LDH ( $x\%$ ):  $x\% = 0.99\%$ ,  $1.96\%$ ,  $4.76\%$ ,  $9.09\%$ ,  $16.67\%$  respectively and pristine C3C solution ( $1 \times 10^{-5}$  M). IRF: instrument response function.

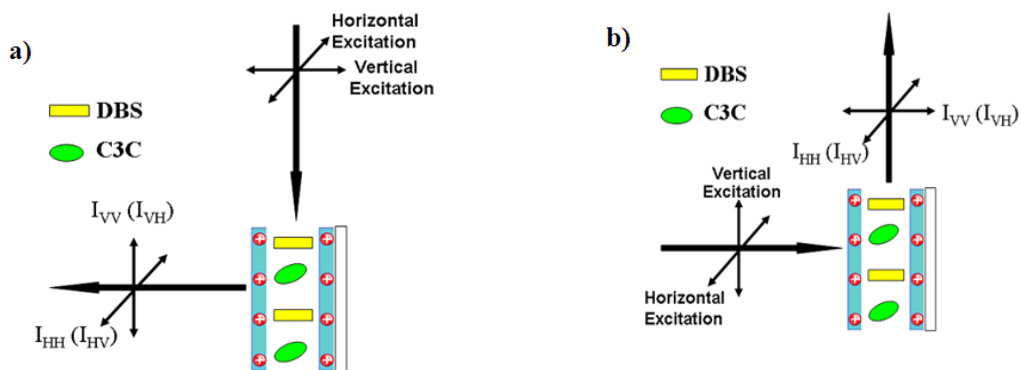

**Scheme S1.** Two typical measurement setups of polarized fluorescence: the incident excitation light run along the glancing (a) and normal direction (b) of the thin film for Figure 7.

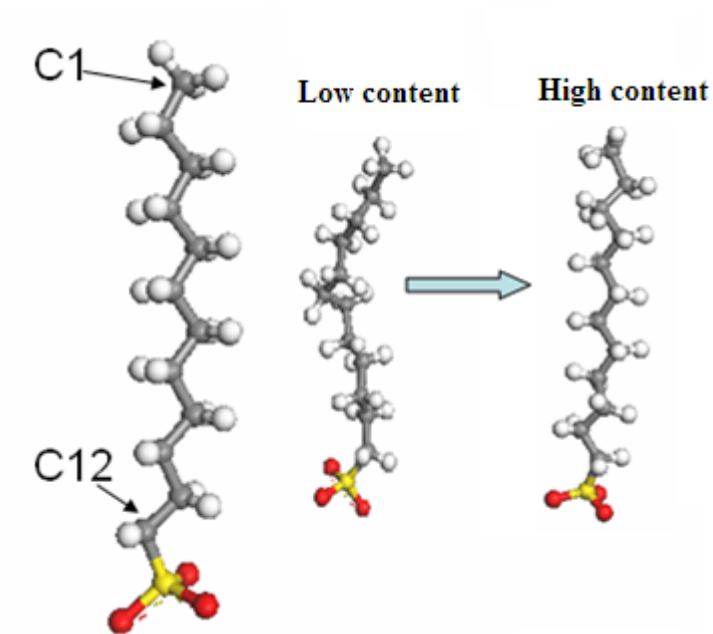

**Scheme S2.** The scheme of the distance  $r_1$  between C1 and C12 (the terminal C atoms) for Figure 10.

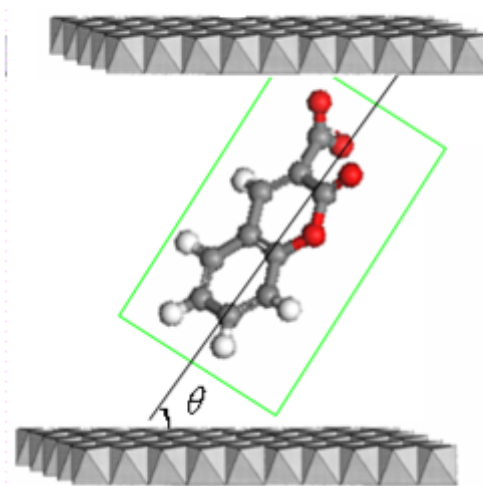

**Scheme S3.** The orientational angle  $\theta$  (the plane of C3C with respect to the LDH layer) for Figure 11.

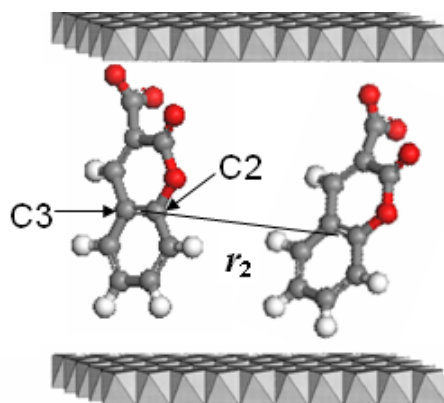

**Scheme S4.** The scheme of the average distance  $\langle r_2 \rangle$  for Figure 12.
